# Supplementary material for: Beyond the Dilemmas: Design of PLA-PEG Assemblies Based on pH-Reversible Boronic Ester for the Synchronous PEG De-Shielding and Ligand Presentation to Hepatocytes
Source: MDPI journal article supplement (doi:10.3390/app12094225), 2022-04-22
Supplement: s1 [file s1]

## SUPPORTING information

**Beyond the dilemmas: design of PLA-PEG assemblies based on pH-reversible boronic ester for the synchronous PEG de-shielding and ligand presentation to hepatocytes.**

Carla Sardo<sup>1\*</sup>, Carmela Tommasino<sup>1</sup>, Giulia Auriemma<sup>1</sup>, Tiziana Esposito<sup>1</sup>, Rita Patrizia Aquino<sup>1</sup>

<sup>1</sup>*Department of Pharmacy, University of Salerno, Fisciano, Italy*

*\*correspondence: csardo@unisa.it*

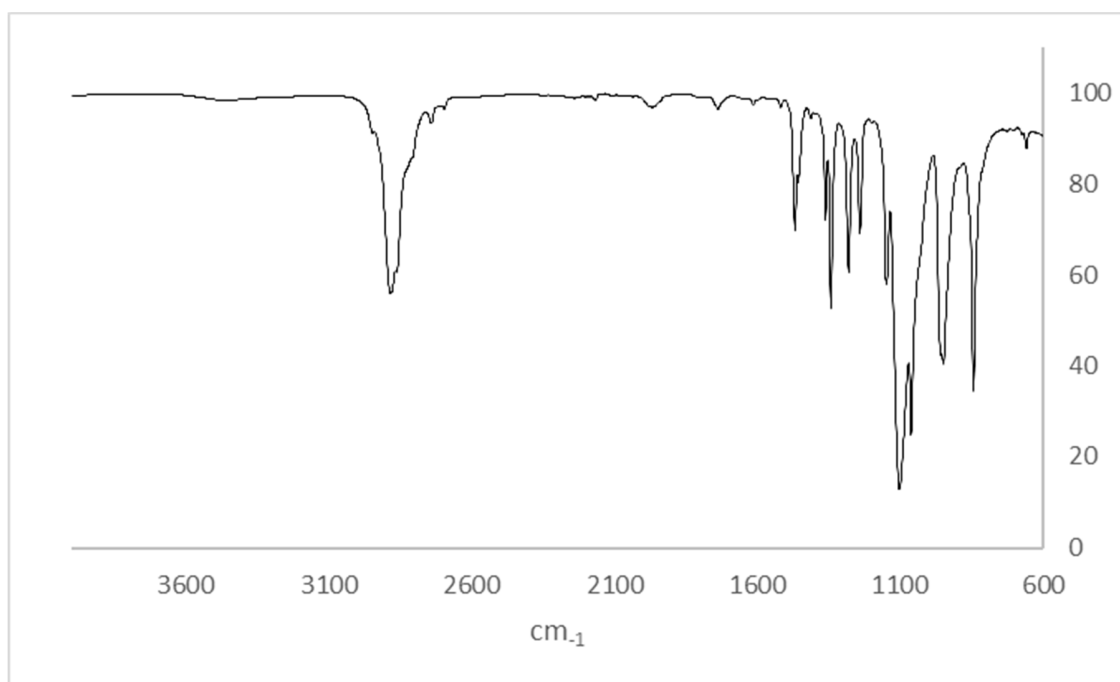

**Figure S1.** ATR FTIR spectrum of MeO-PEG<sub>2000</sub>-PBA.

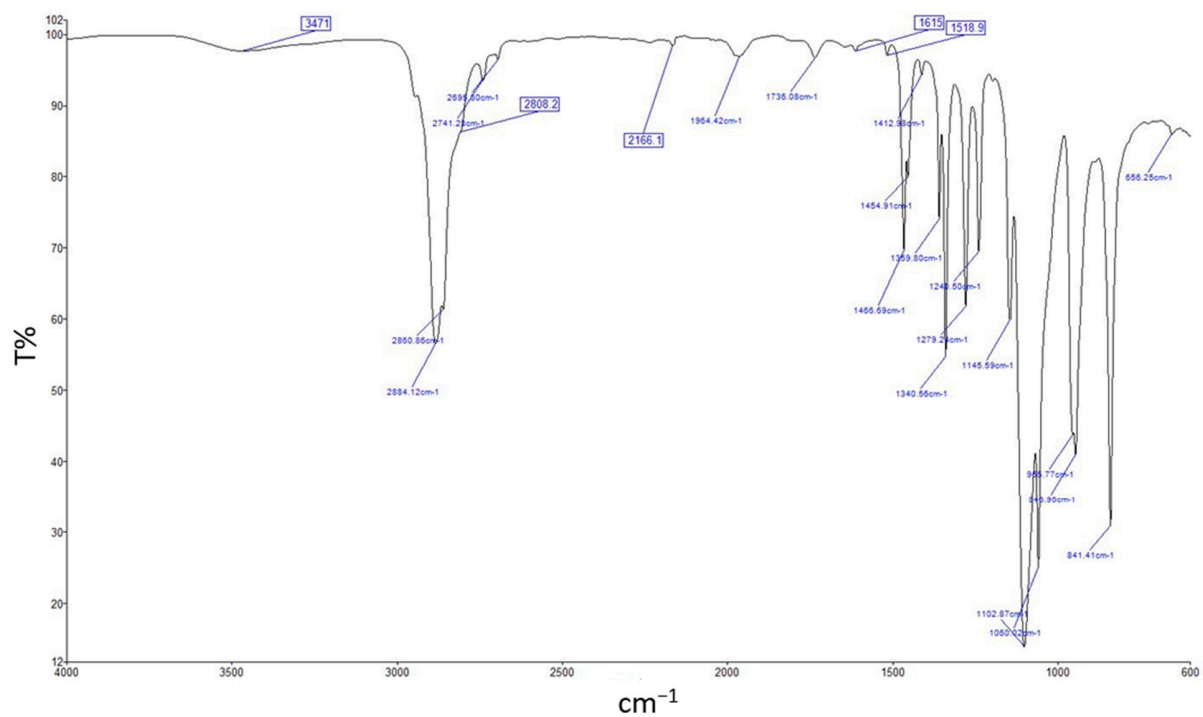

**Figure S2.** ATR FTIR spectrum of MeO-PEG<sub>2000</sub>-PBA.

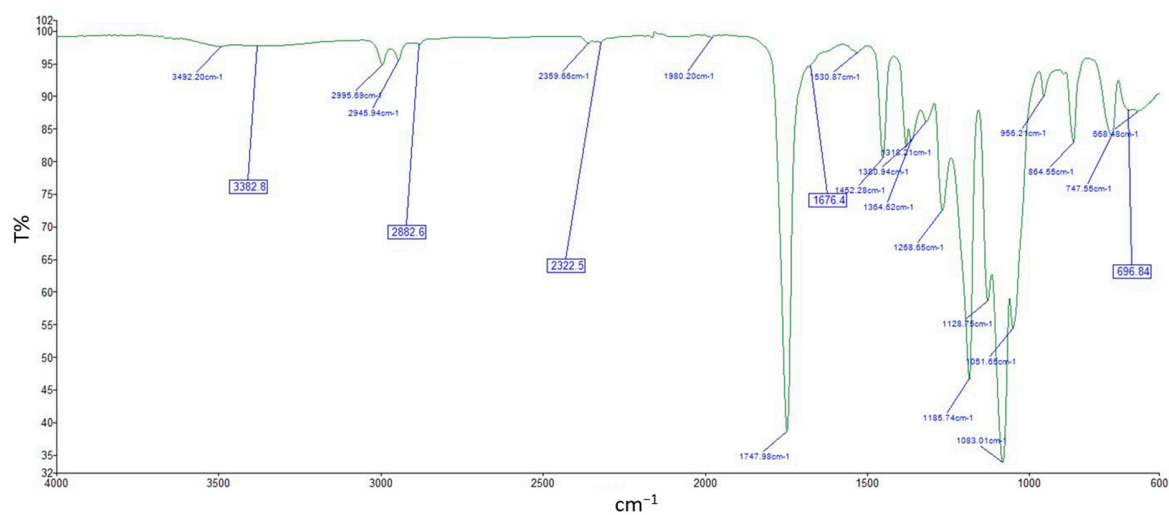

**Figure S3.** ATR FTIR spectrum of PLA-Alk.

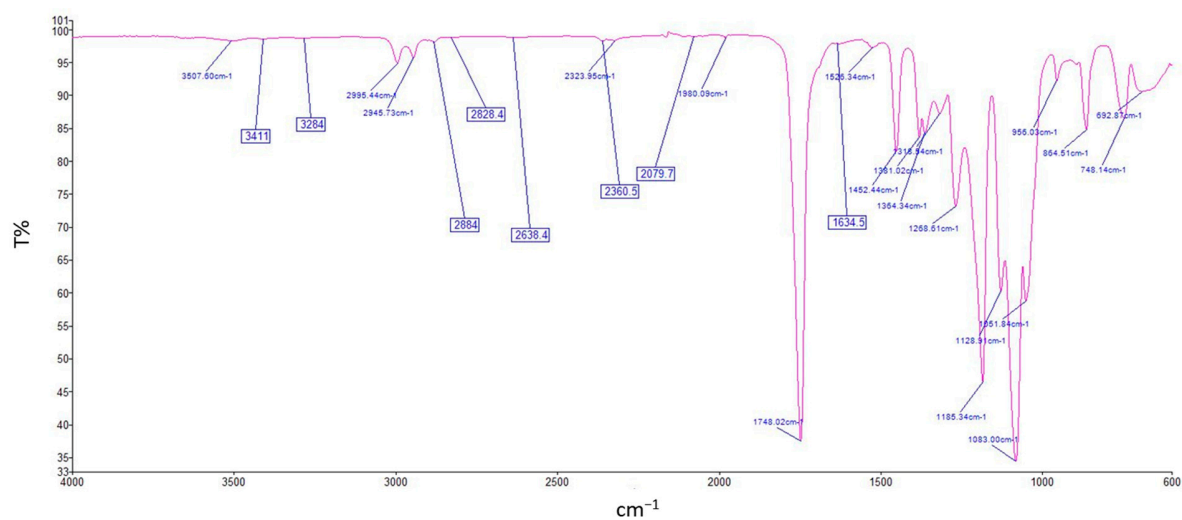

**Figure S4.** ATR FTIR spectrum of PLA-Gal.

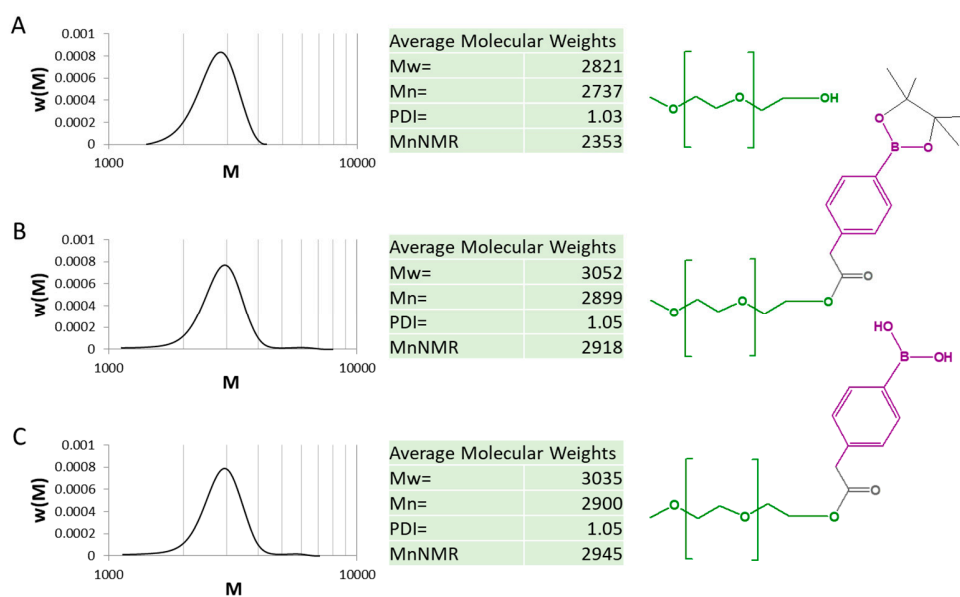

**Figure S5.** Characteristics of PEG derivatives and their weighted distribution of MW obtained by GPC. A: MeO-PEG<sub>2000</sub>; B: MeO-PEG<sub>2000</sub>-PBAPin; C: MeO-PEG<sub>2000</sub>-PBA.

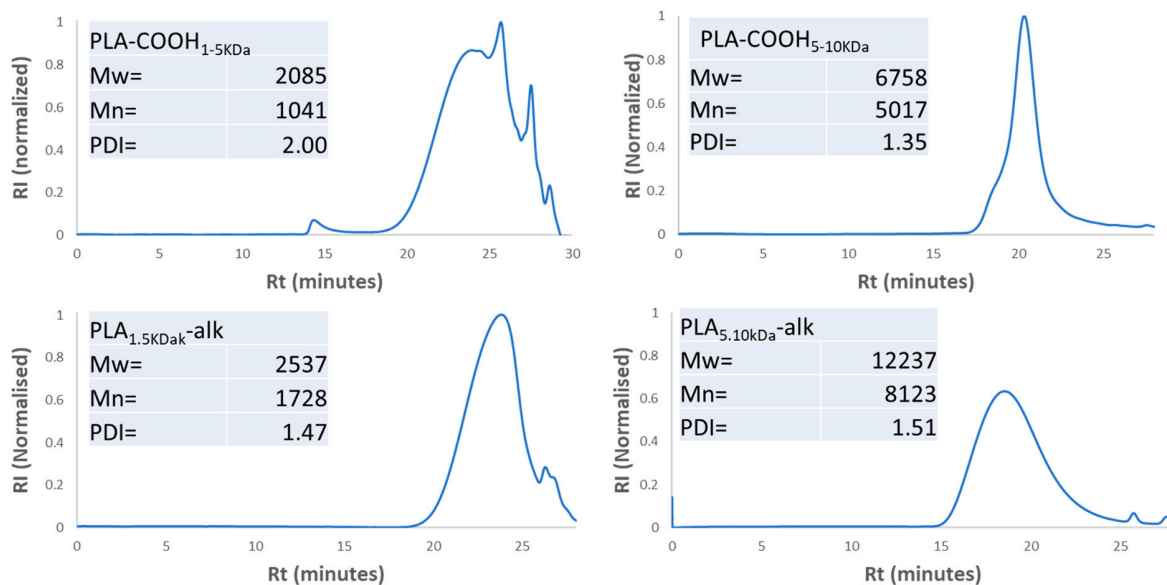

**Figure S6.** Characteristics of PLA-COOH and their GPC traces.

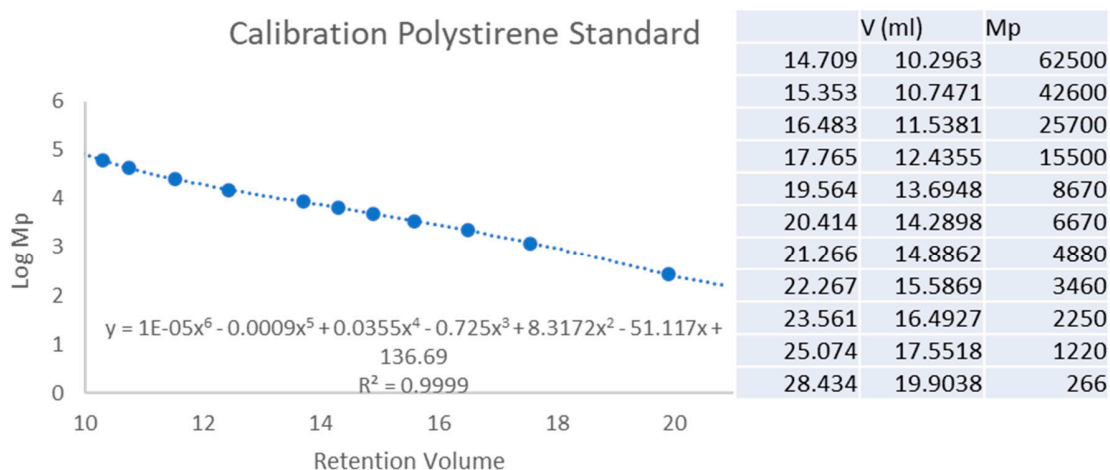

**Figure S7.** Calibration of the GPC system. Processing was carried out according with Gavrilov and Monteiro[16]. Calibration curve with various PEG standards (in the range 600 - 44000 Da) was obtained by polynomial regression, with satisfying correlation coefficients.

#### Analytical methods used for the calculation of binding constants

At pH 10, for each sample, the amount of complex [AB] was calculated as the difference between initial concentration of ARS ( $C_{ars}$ ) and the free one at the equilibrium [A], determined by lambert beer law. The binding constant was then obtained by nonlinear regression from Equation (S1):

$$[AB] = \frac{C_{ars} + C_{PEG-PBA} + \frac{1}{K_{ars}} - \sqrt{(C_{ars} + C_{PEG-PBA} + \frac{1}{K_{ars}})^2 - 4C_{ars} C_{PEG-PBA}}}{C_{ars}} \quad (S1)$$

At pH 7.4, being the absorption of ARS overlapped with the one of the complex, the hypsochromic shift of the band was followed with increasing the concentration of MeO-PEG<sub>2000</sub>-PBA (**Figure S8A**). According with Gennari et al.[8], raw data of the spectra of ARS alone and ARS/MeO-PEG-PBA 1:100, taken as the pure complex, were fitted with Gaussian curves (**Figure S8B**).

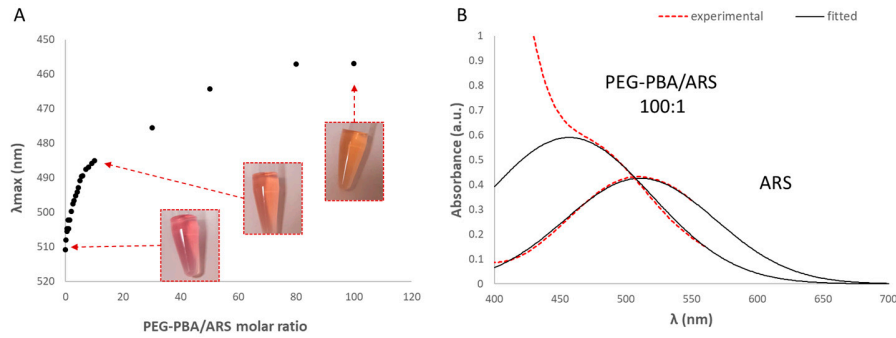

**Figure S8.** A. Hypsochromic shift of the band around 500 nm with increasing the concentration of MeO-PEG<sub>2000</sub>-PBA in the presence of Alizarin red S at a concentration of  $10.2 \cdot 10^{-2}$  mM. B. Experimental and fitted spectra of ARS alone and ARS/MeO-PEG-PBA 1:100. By adding increasing amount of MeO-PEG-PBA to an ARS solution with a fixed concentration, a gradually more intensive orange color was observed, qualitatively suggesting the interaction between ARS and MeO-PEG-PBA (the medium alone, PBS with 1% of DMSO, pH 7.5 didn't produce any shift when mixed with ARS solution, data not shown). Approaching a MeO-PEG-PBA/ARS molar ratio of 100, the shift was constant at 457 nm and the equilibrium shifted towards the ester.

Using a linear combination of those curves (**Equation (S2)**), the spectra for different ARS/APBA mixtures was calculated (**Figure S9A**) and the  $\lambda_{max}$  of the obtained gaussians were plotted versus the free ARS molar fraction,  $\chi_A$  (**Figure S9B**). The data fits with a Boltzman distribution (**Equation (S3)**).

$$Abs = \chi_A C_{ars} \varepsilon_{ars} e^{-2 \left[ \frac{\lambda - \lambda_{max}^{ars}}{\omega_{ars}} \right]^2} + (1 - \chi_A) C_{ars} \varepsilon_{ars}^{PBA} e^{-2 \left[ \frac{\lambda - \lambda_{max}^{ars}^{PBA}}{\omega_{ars}^{PBA}} \right]^2} \quad (S2)$$

$$\lambda_{max} = \frac{(524.47 - 448.42)}{1 + e^{(\chi_A - 0.576)/-0.278}} + 448.42 \quad (S3)$$

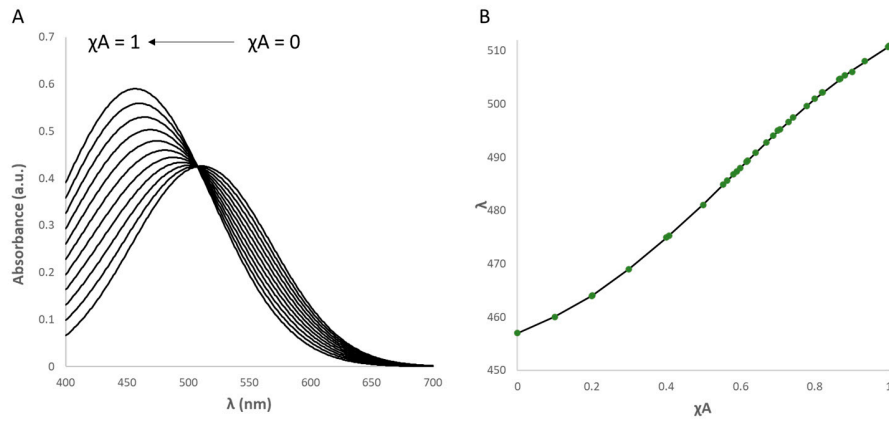

**Figure S9.** A. Calculated spectra for different ARS/APBA mixtures. B. Boltzman distribution of  $\lambda_{\max}$  vs free ARS molar fraction ( $\chi_A$ ).

Through this master curve,  $\chi_A$  was extrapolated for each MeO-PEG<sub>2000</sub>-PBA/ARS and the binding constant ( $K_{ars}$ ) was then obtained by nonlinear regression from **Equation (S4)**:

$$\chi_A = 1 - \frac{[AB]}{C_{ars}} = 1 - \frac{C_{ars} + C_{PEG-PBA} + \frac{1}{K_{ars}} - \sqrt{(C_{ars} + C_{PEG-PBA} + \frac{1}{K_{ars}})^2 - 4C_{ars} C_{PEG-PBA}}}{2C_{ars}} \quad (S4)$$

The gradual addition of Gal to an ARS boronic ester determines the competitive equilibrium  $AB + D \leftrightarrow DB + A$  which is governed by a constant ( $K_{exc}$ ) which can be expressed as the ratio of the two equilibrium constants for the formation of individual boronic esters, AB ( $K_{ars}$ ) and DB ( $K_{Gal}$ ), but can also be expressed as a function of the concentration of free ARS as the only variable (see Equations (S5) and (S6)).

$$K_{exc} = \frac{K_{Gal}}{K_{ars}} \quad (S5)$$

$$K_{exc} = \frac{[A](C_{PEG-PBA} - C_{ars} + [A])}{(C_{ars} - [A])[C_{Gal} - C_{PEG-PBA} + (C_{ars} - [A])]} \quad (S6)$$
