# Supplementary material for: Beyond the Dilemmas: Design of PLA-PEG Assemblies Based on pH-Reversible Boronic Ester for the Synchronous PEG De-Shielding and Ligand Presentation to Hepatocytes
Source: MDPI journal article supplement (doi:10.3390/app12094225), 2022-04-22
Supplement: s1 [file s1]

Archive with 1 entries (1 files):
- applsci-1634701-supplementary.pdf
